# Supplementary material for: Antibacterial activities of physiologically stable, self-assembled peptide nanoparticles
Source: Royal Society of Chemistry journal article supplement (doi:10.1039/d1tb01864g), 2021-01-01
Supplement: d1tb01864g1.pdf [file d1tb01864g1.pdf]

## Supporting Information

# Antibacterial and Immunomodulatory Activities of Physiologically Stable, Self-Assembled Peptide Nanoparticles

*Nauman Nazeer<sup>1</sup>, Jeffrey R. Simmons<sup>2</sup>, Jan K. Rainey<sup>2-4</sup> Juan Carlos Rodriguez- Lecompte<sup>5</sup>,  
Marya Ahmed<sup>1,6</sup>*

Department of Chemistry University of Prince Edward Island, Charlottetown, Prince Edward  
Island, Canada, C1A 4P3<sup>1</sup>, Department of Biochemistry & Molecular Biology<sup>2</sup>, Department of  
Chemistry<sup>3</sup>, School of Biomedical Engineering, Dalhousie University, Halifax, Nova Scotia B3H  
4R2, Canada<sup>4</sup>; Department of Pathology and Microbiology, Atlantic Veterinary College<sup>5</sup>,  
Faculty of Sustainable Design Engineering<sup>6</sup>; University of Prince Edward Island, Charlottetown,  
Prince Edward Island, Canada, C1A 4P3

Corresponding email address: [marahmed@upei.ca](mailto:marahmed@upei.ca)

**Table S1.** Particle size and zeta potential of FC-DSNs at different FC:peptide weight ratios.

| Sample         | Particle size (nm) | Zeta Potential (mV) |
|----------------|--------------------|---------------------|
| DSN aggregates | 282.03 ± 100.41    | 14.14 ± 1.08        |
| FC-DSNs (1:4)  | 130.96 ± 1.58      | 8.45 ± 1.23         |
| FC-DSNs (1:2)  | 113.74 ± 20.32     | -0.60 ± 0.04        |
| FC-DSNs (1:1)  | 159.99 ± 11.86     | -15.98 ± 2.88       |

**Table S2.** Determination of C $\alpha$  and H $\alpha$  amino acid secondary structure through comparison of chemical shifts relative to random coil shifts for amino acids in 100% DMSO.

| # | Residue | $\Delta\delta C\alpha$ | Threshold Helix | Threshold Sheet | Structure | $\Delta\delta H\alpha$ | Threshold Helix | Threshold Sheet | Structure |
|---|---------|------------------------|-----------------|-----------------|-----------|------------------------|-----------------|-----------------|-----------|
| * | Cys     | -1.355                 | >1.3            | <-0.1           | Sheet     | -0.117                 | <-0.16          | >0.22           | Helix     |
| * | Arg     | -0.536                 | >1.3            | <-0.1           | Coil      | -0.079                 | <-0.16          | >0.22           | Coil      |
| * | Phe     | -1.375                 | >1.3            | <-0.1           | Sheet     | 0.051                  | <-0.16          | >0.22           | Coil      |
| * | Lys     | -0.701                 | >1.3            | <-0.1           | Sheet     | -0.12                  | <-0.16          | >0.22           | Helix     |
| * | Phe     | -1.607                 | >1.3            | <-0.1           | Sheet     | -0.002                 | <-0.16          | >0.22           | Coil      |
| * | Arg     | -0.713                 | >1.3            | <-0.1           | Sheet     | -0.11                  | <-0.16          | >0.22           | Helix     |
| * | Ile     | -0.931                 | >1.3            | <-0.1           | Sheet     | -0.085                 | <-0.16          | >0.22           | Coil      |
| 8 | Val     | -0.565                 | >1.3            | <-0.1           | Coil      | -0.062                 | <-0.16          | >0.22           | Coil      |
| * | Ile     |                        | >1.3            | <-0.1           |           |                        | <-0.16          | >0.22           |           |
| * | Cys     |                        |                 | <-0.1           |           |                        | <-0.16          | >0.22           |           |

\* indicates ambiguous assignments

**Table S3.** Determination of C $\beta$  amino acid secondary structure through comparison of chemical shifts relative to random coil shifts for amino acids in 100% DMSO.

| # | Residue | $\Delta\delta C\beta$ | Threshold Helix | Threshold Sheet | Structure |
|---|---------|-----------------------|-----------------|-----------------|-----------|
| * | Cys     |                       | <-0.3           | >0.2            |           |
| * | Arg     | -0.694                | <-0.3           | >0.2            | Coil      |
| * | Phe     | 1.761                 | <-0.3           | >0.2            | Sheet     |
| 4 | Lys     | -0.38                 | <-0.3           | >0.2            | Coil      |
| * | Phe     | 2.042                 | <-0.3           | >0.2            | Sheet     |
| * | Arg     | -0.676                | <-0.3           | >0.2            | Coil      |
| * | Ile     | -1.112                | <-0.3           | >0.2            | Helix     |
| 8 | Val     | -0.552                | <-0.3           | >0.2            | Coil      |
| * | Ile     | -0.705                | <-0.3           | >0.2            | Helix     |
| * | Cys     |                       | <-0.3           | >0.2            |           |

\* indicates ambiguous assignments

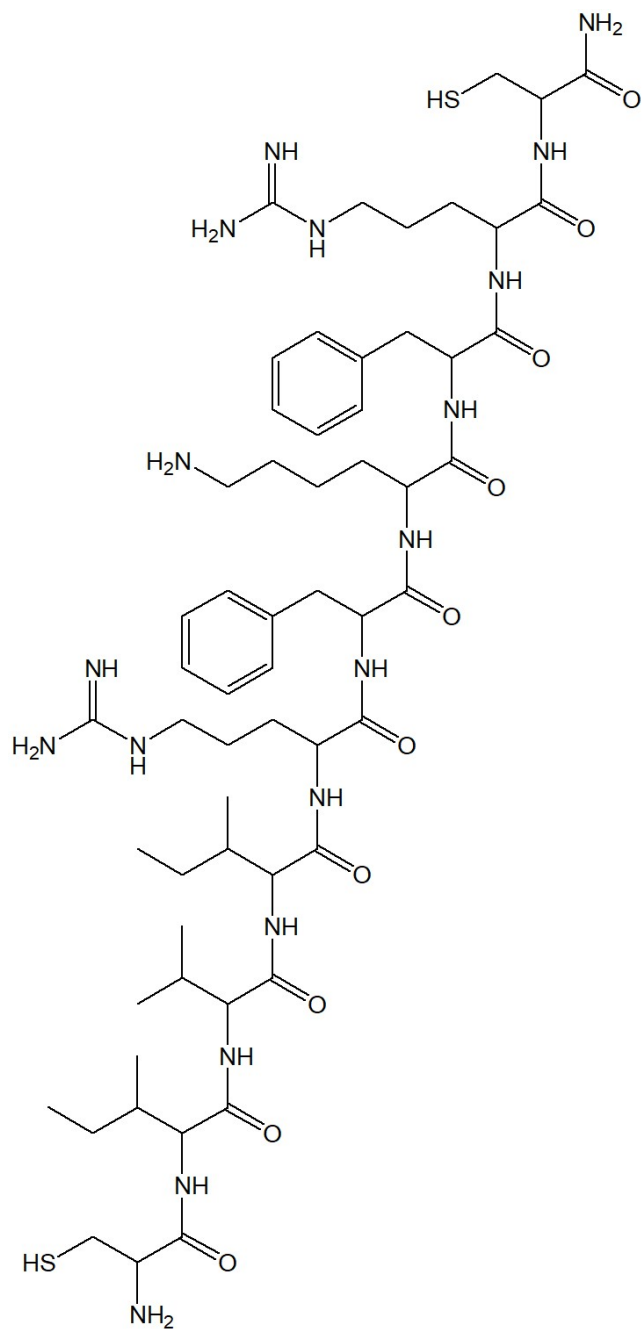

**Figure S1.** Chemical structure of CRFKFRIVIC peptide.

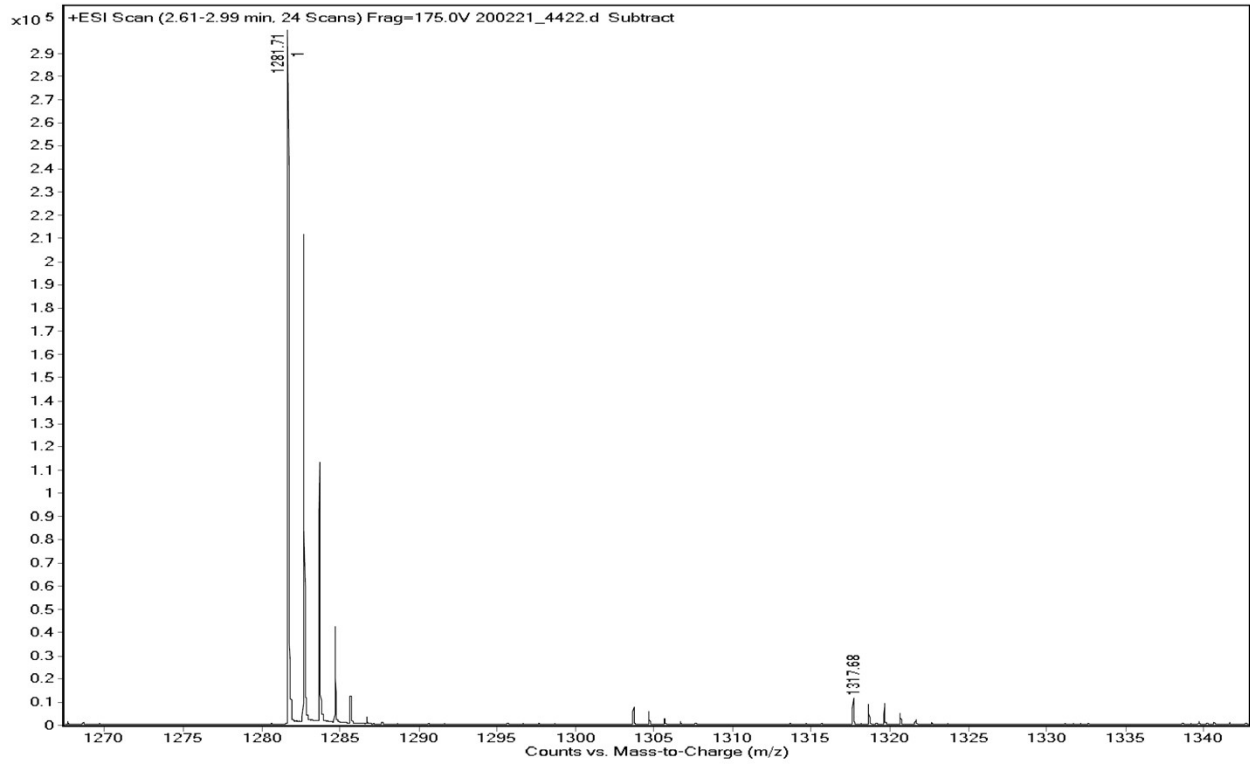

**Figure S2.** Mass spectrometry data for CRFKFRIVIC peptide.

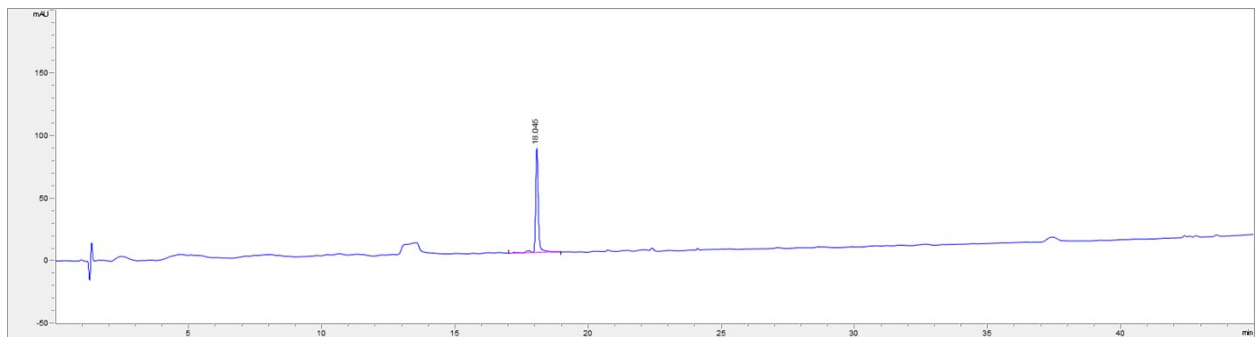

**Figure S3.** RP-HPLC chromatogram of CRFKFRIVIC peptide.

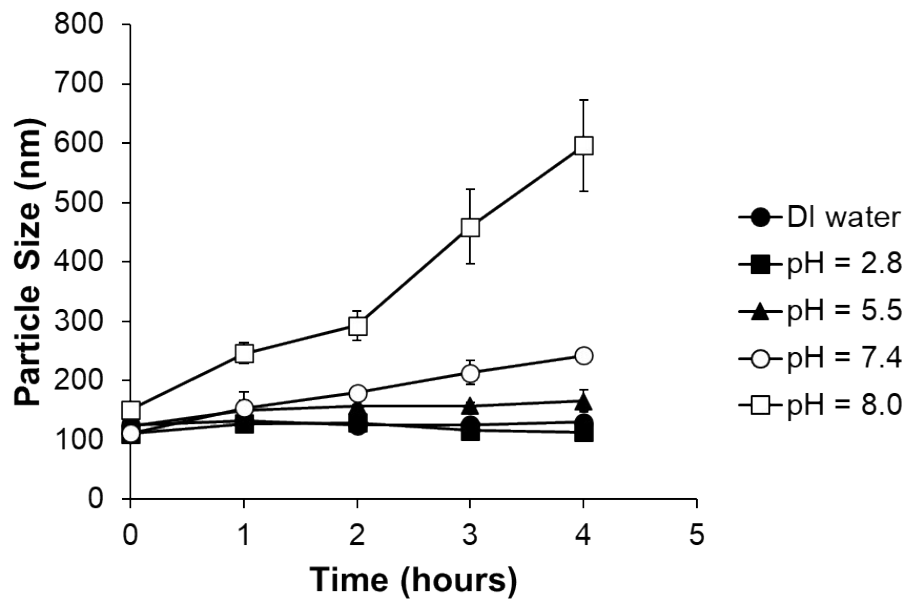

**Figure S4.** Effect of pH on particle size of FC-DSNs.

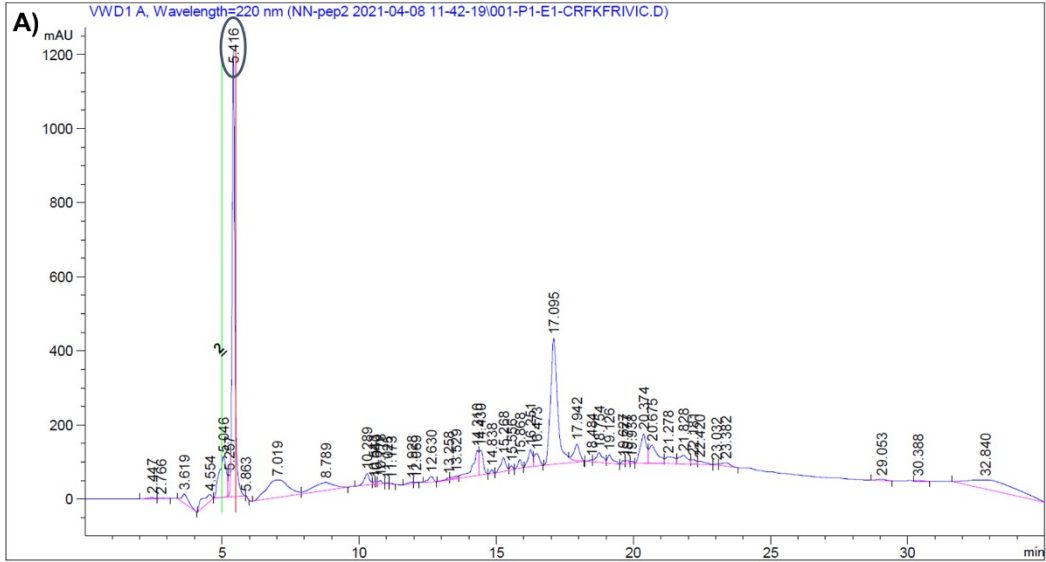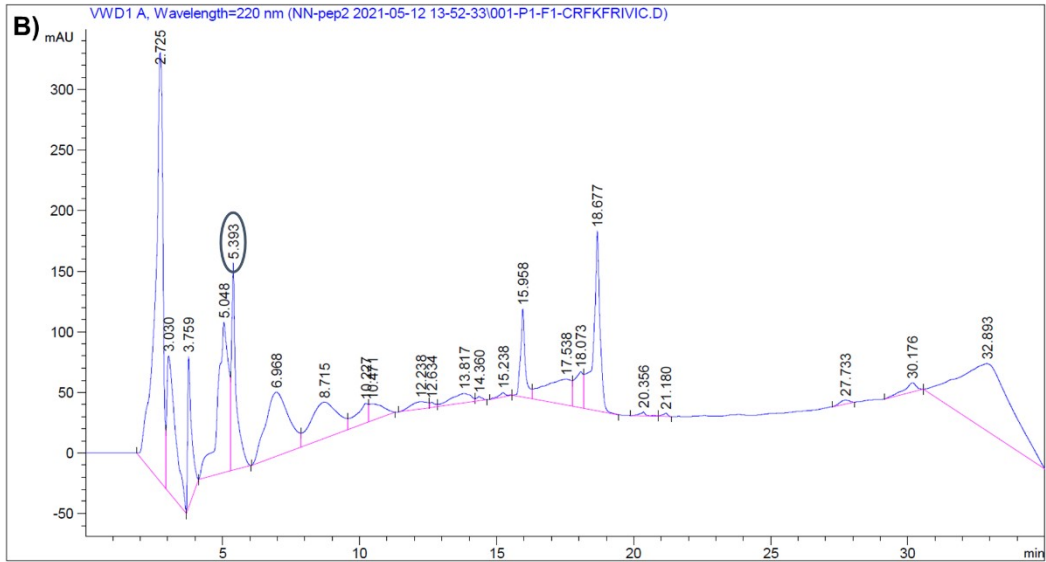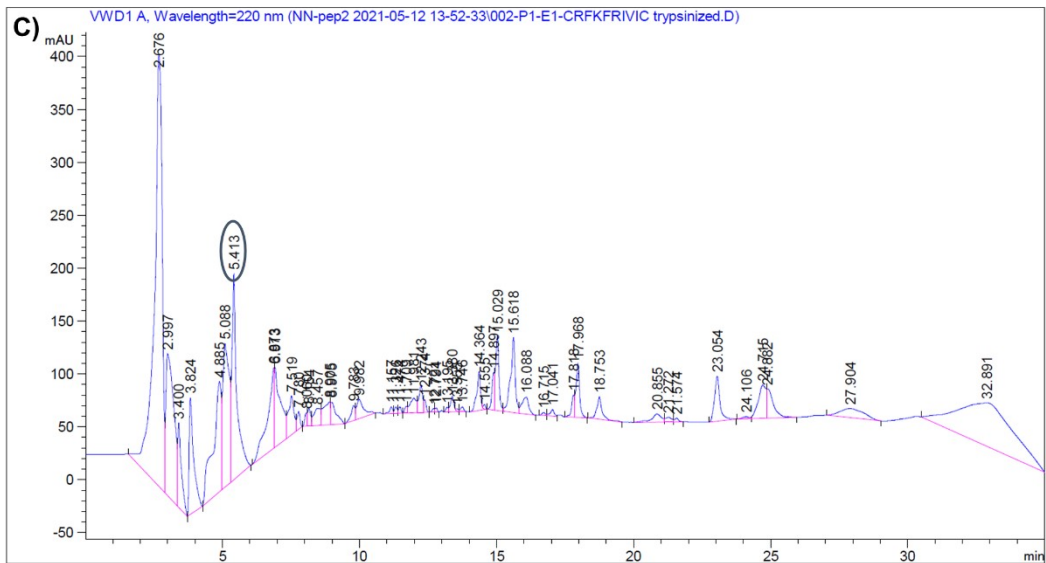

**Figure S5.** RP-HPLC chromatograms of **A)** DSNs in water:acetonitrile solution with 0.1% TFA, **B)** DSNs in Tris-buffer **C)** DSNs in Tris-buffer in the presence of trypsin-EDTA.

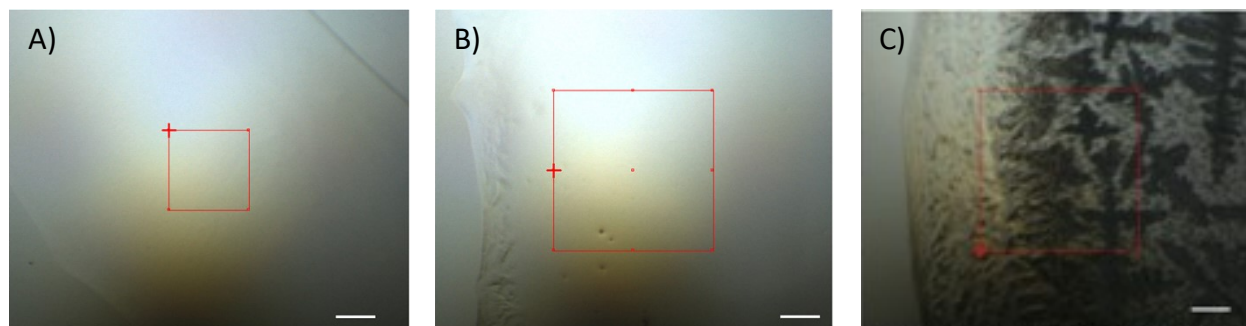

**Figure S6.** Optical microscopy images of thin films cast from **(A)** CRFKFRIVIC peptide in DMSO; **(B)**  $\beta$ -CD-DSNs; and **(C)** FC-DSNs. Red boxes and points are illustrative of sampling positions at which FTIR spectra were acquired for a given sample; scale bars are 50  $\mu$ m.



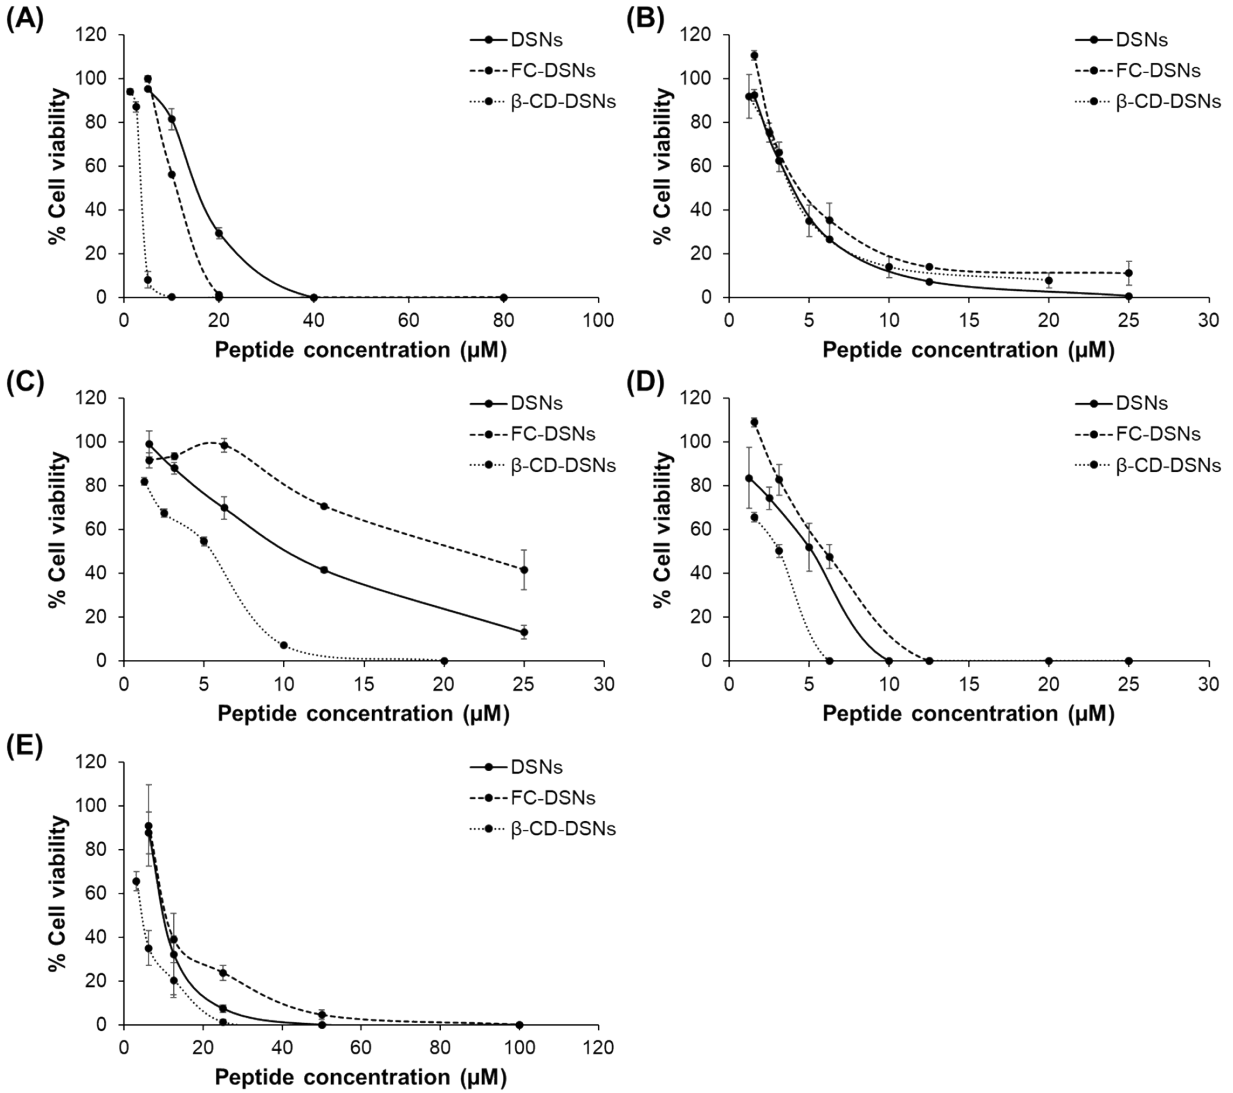

**Figure S7.** Concentration-dependent antibacterial activity of DSNs, FC-DSNs, and  $\beta$ -CD-DSNs after 4-hour treatment against (A) *E. coli* (ATCC 25922); (B) *S. aureus* (ATCC 25923); (C) *S. enterica* (ATCC 13076); (D) *L. monocytogenes* (ATCC 19115); and (E) *B. subtilis* (ATCC 6051).

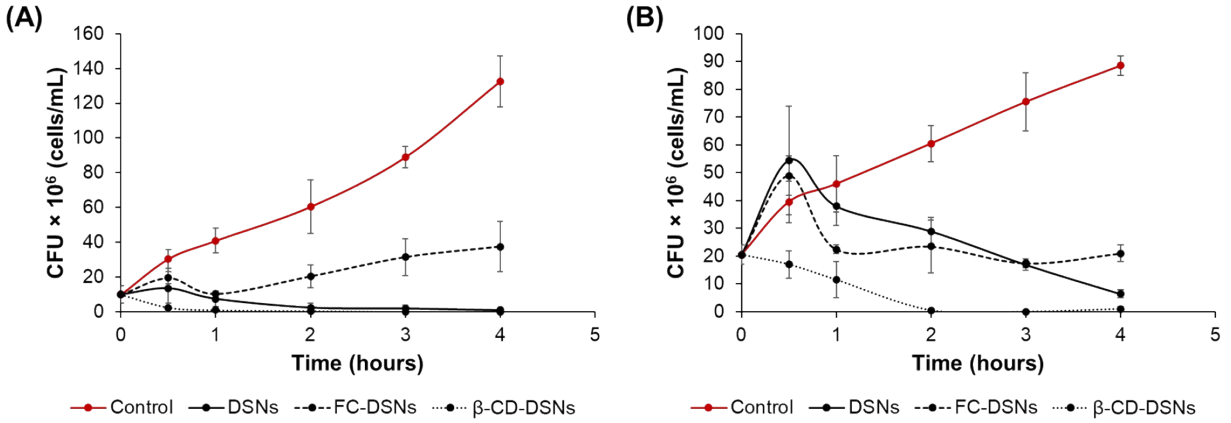

**Figure S8.** Time-dependent antibacterial activity of DSNs, FC-DSNs, and β-CD-DSNs at a peptide concentration of 25 μM against **(A)** *E. coli* (NEB 5α) and **(B)** *B. subtilis* (ATCC 6051).

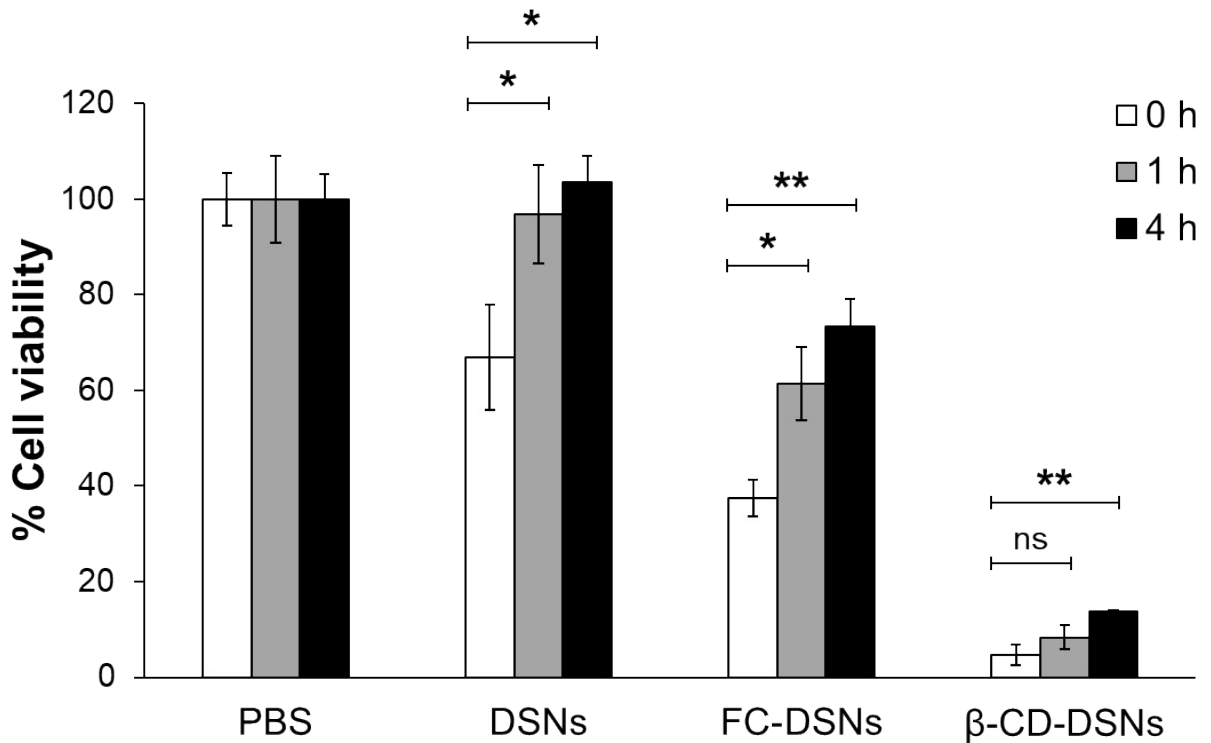

**Figure S9.** Antibacterial activity of DSNs and its macromolecular analogues in the presence of serum proteins. \* indicates p-value < 0.05, \*\* indicates p-value < 0.01, and ns indicates no statistically significant difference.

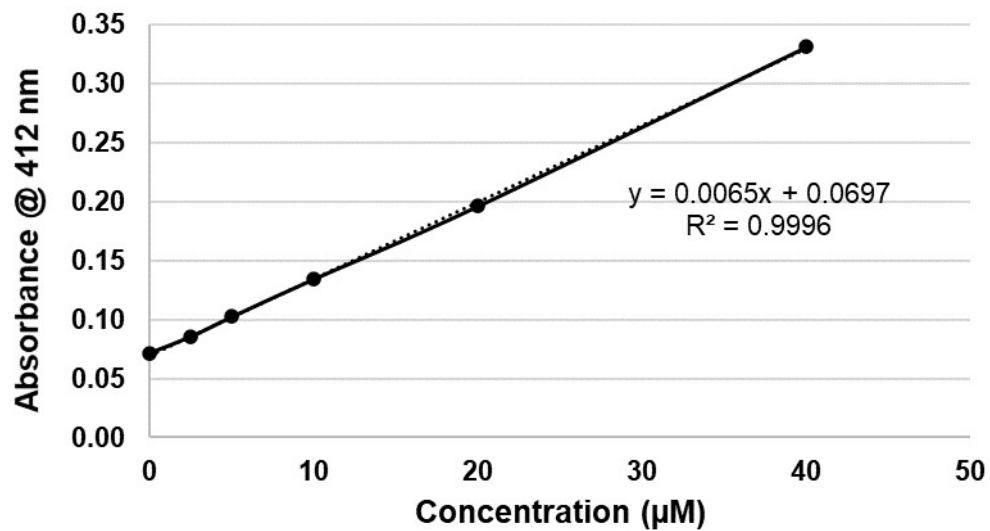

| Sample       | Mean Absorbance @ 420 nm |
|--------------|--------------------------|
| Blank        | 0.0718 ± 0.0004          |
| DSNs (40 µM) | 0.087 ± 0.0002           |

**Figure S10.** Calibration of L-cysteine hydrochloride monohydrate by Elman's assay.

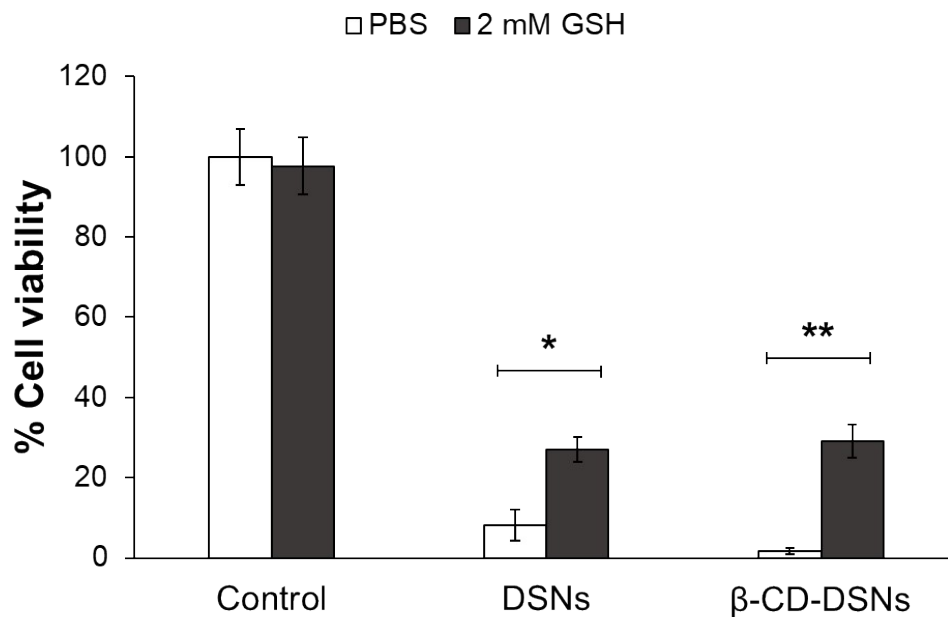

**Figure S11.** Antibacterial activity of DSNs and  $\beta$ -CD-DSNs in the presence of 2mM GSH. \* indicates p-value < 0.05 and \*\* indicates p-value < 0.01.

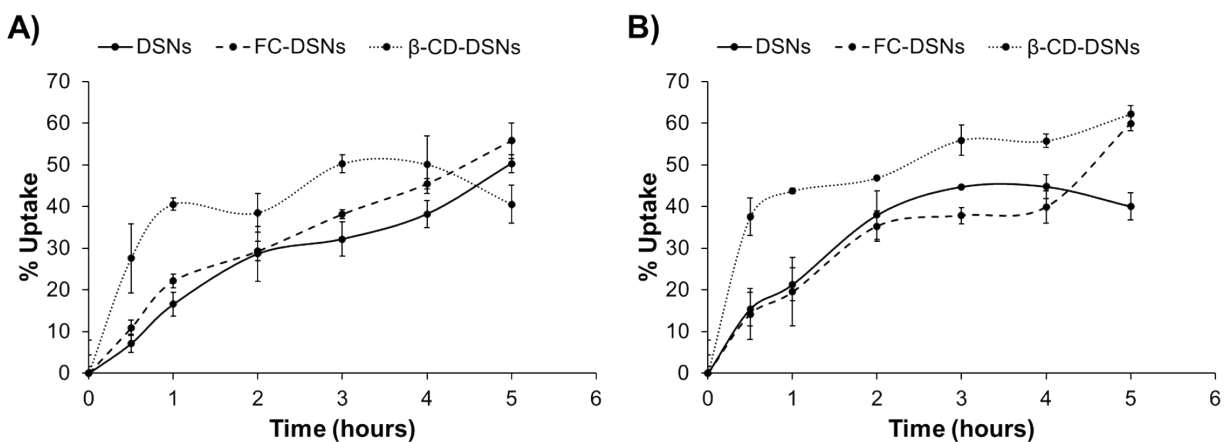

**Figure S12.** Uptake of TAMRA-labelled peptide nanoparticles in (A) *E. coli* and (B) *B. subtilis*.

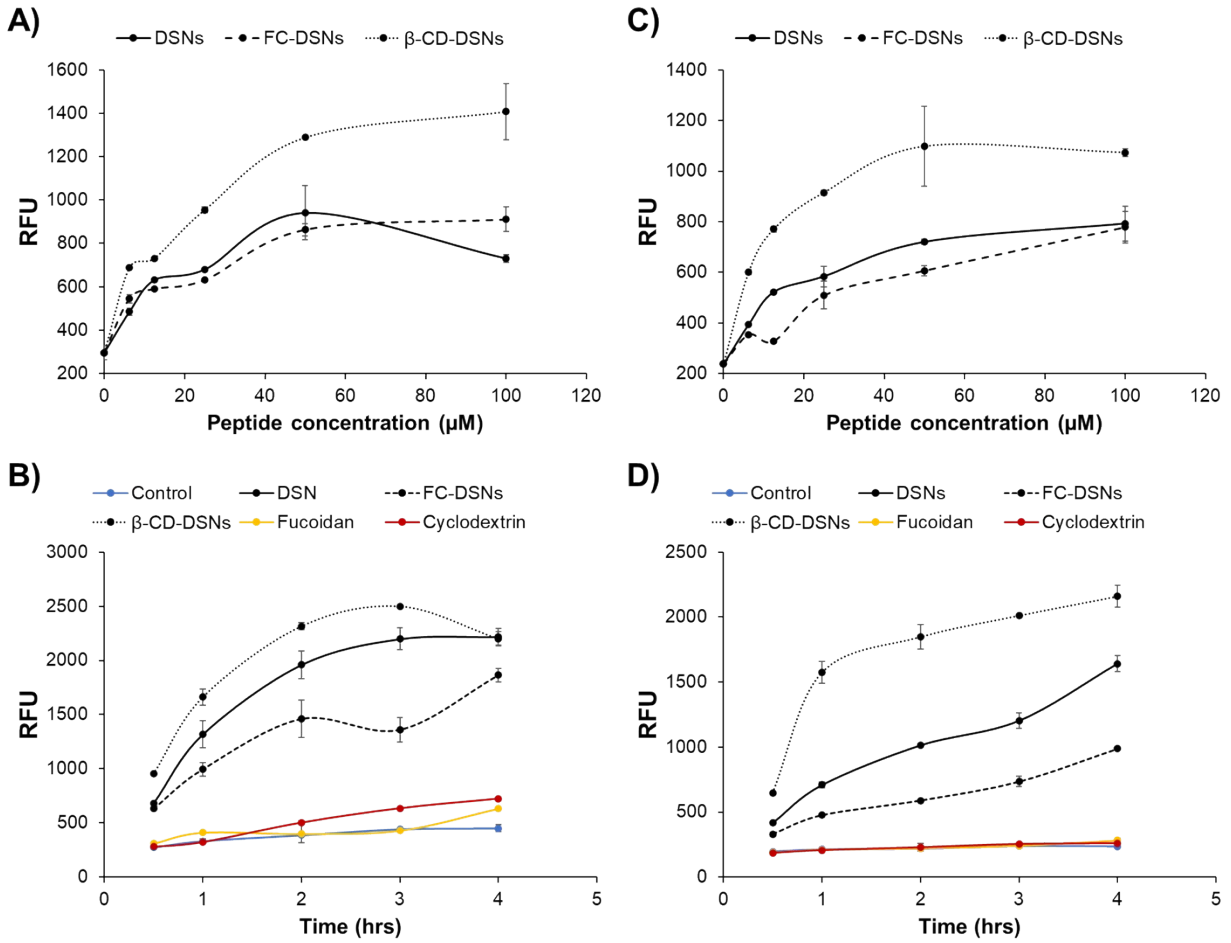

**Figure S13.** Uptake of CF in (A-B) *E. coli* and (C-D) *B. subtilis*. A and C shows concentration-dependent change in membrane permeability after 30 minutes of incubation with samples. B and D shows time-dependent change in membrane permeability after treatment with 25  $\mu\text{M}$  of DSNs and equimolar concentrations of FC-DSN and  $\beta$ -CD-DSN.

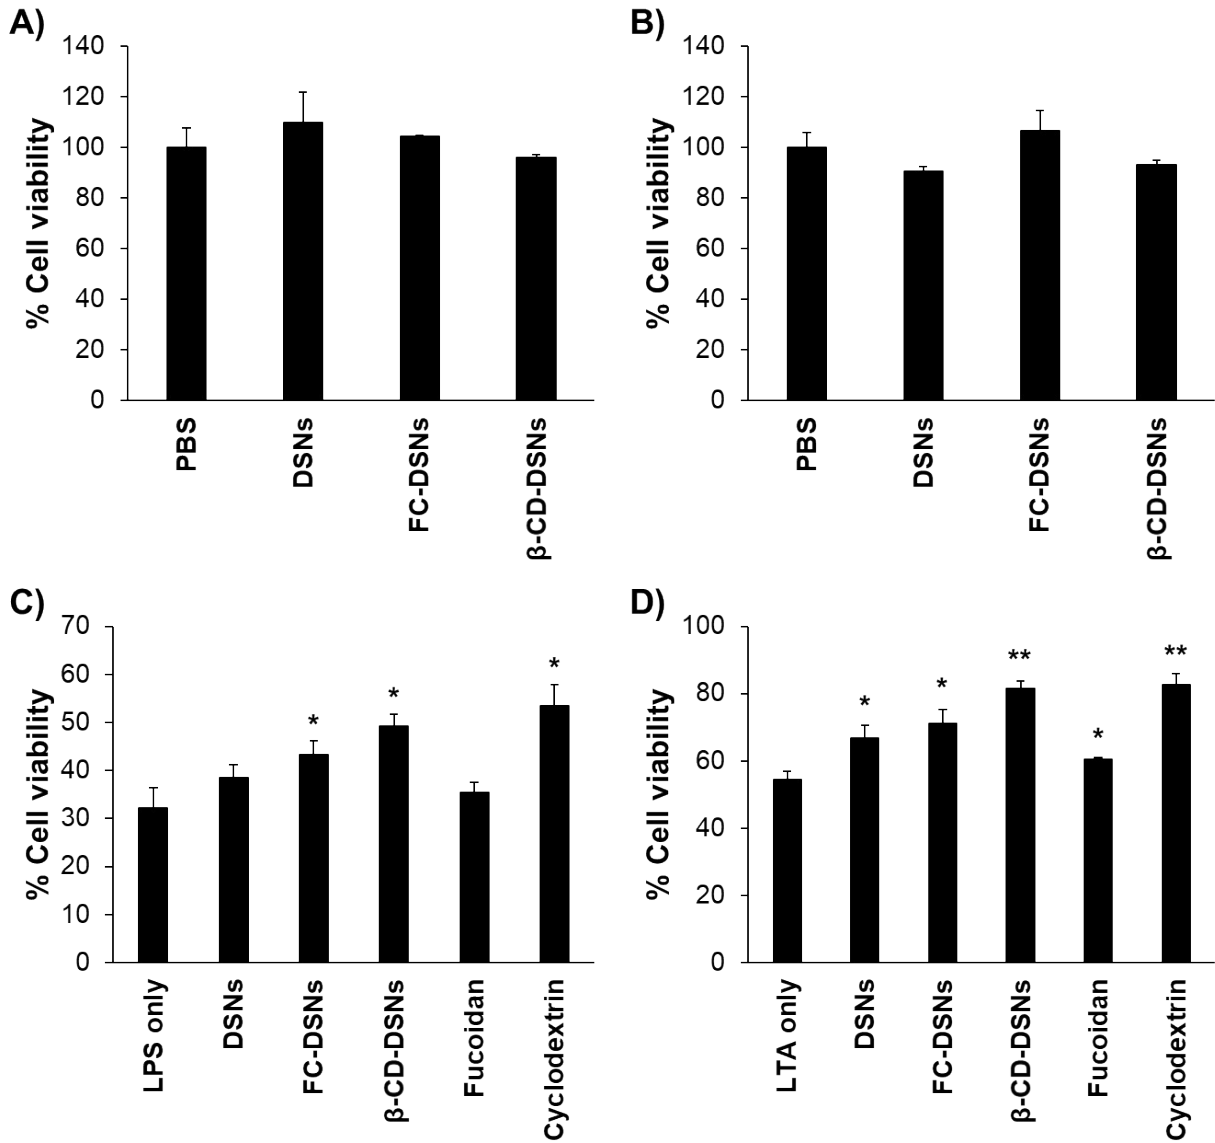

**Figure S14.** Cell viability of (A) DF-1 chicken fibroblasts; (B) Caco-2 cells; (C) Caco-2 cells treated with 100  $\mu$ g/mL LPS; and (D) Caco-2 cells treated with 100  $\mu$ g/mL LTA. \* indicates p-value < 0.05 compared to control treatment and \*\* indicates p-value < 0.01 compared to control treatment.

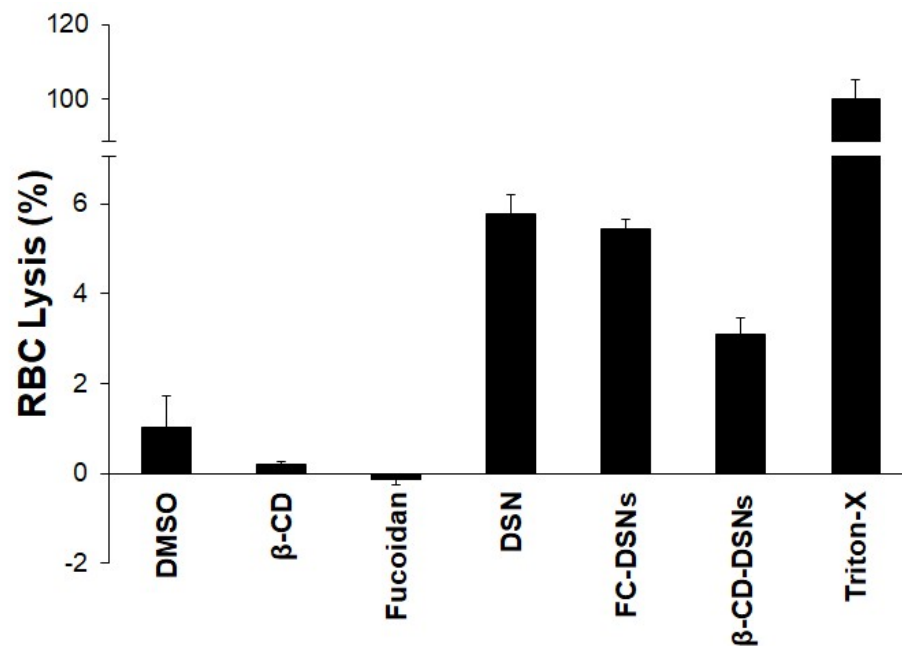

**Figure S15.** Hemolytic activity of peptide-based nanoparticles.
